# Supplementary material for: Fabrication of multifunctional ferromagnetic Au3Pd–CoSe nanoparticles
Source: Royal Society of Chemistry journal article supplement (doi:10.1039/c4ra02264e), 2014-01-01
Supplement: c4ra02264e1.pdf [file c4ra02264e1.pdf]

## Fabrication of Multifunctional Ferromagnetic Au<sub>3</sub>Pd-CoSe Nanoparticles

<sup>s</sup> Wipula P. R. Liyanage,<sup>a,†</sup> Sukhada Mishra,<sup>a,†</sup> Kai Song,<sup>b</sup> and Manashi Nath<sup>\*a</sup>

### Supplementary Information:

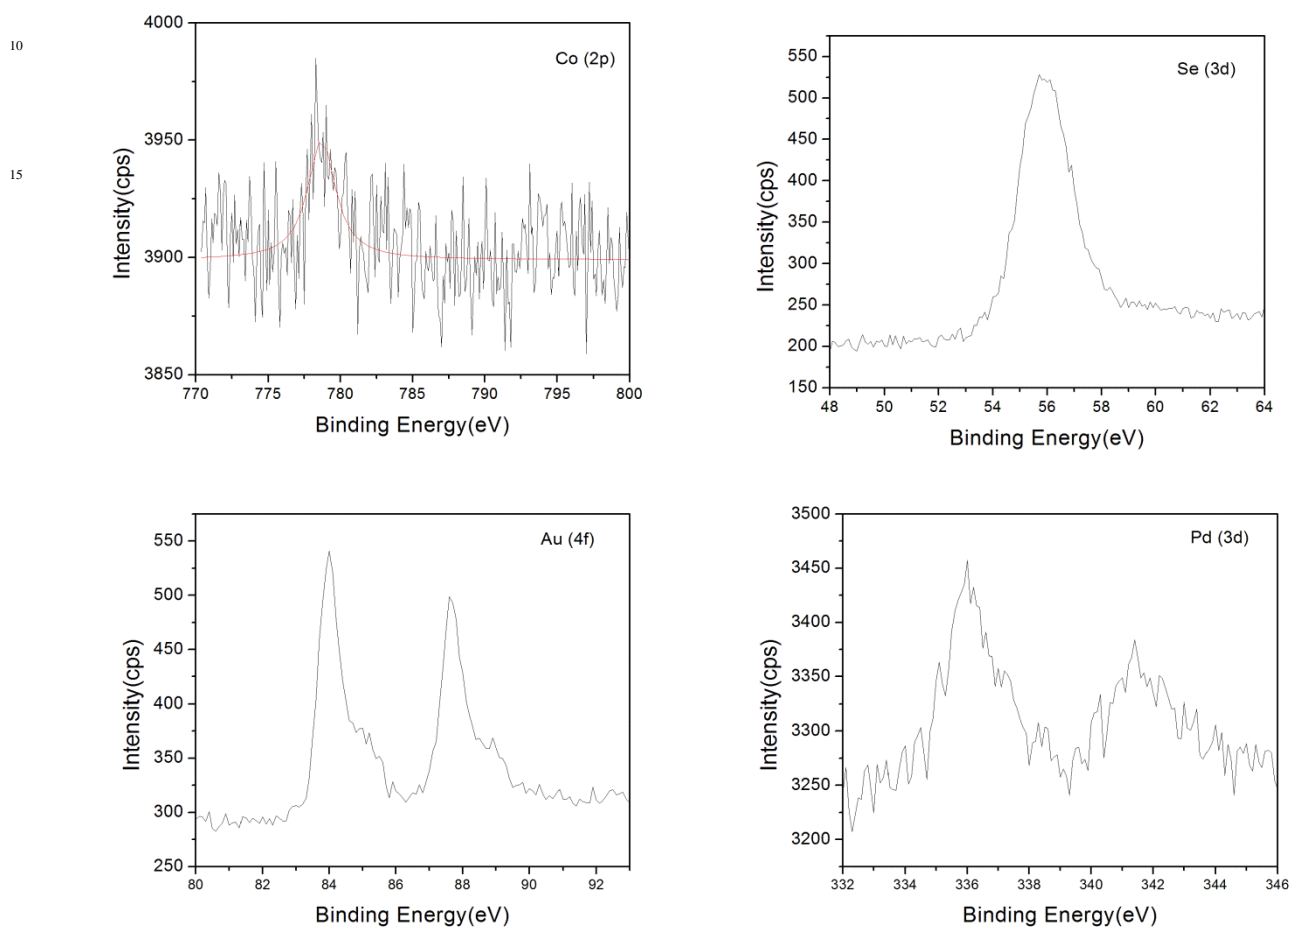

**Fig. S1:** The XPS spectra collected from the Au<sub>3</sub>Pd-CoSe composite nanoparticles after sputtering for 10 s.

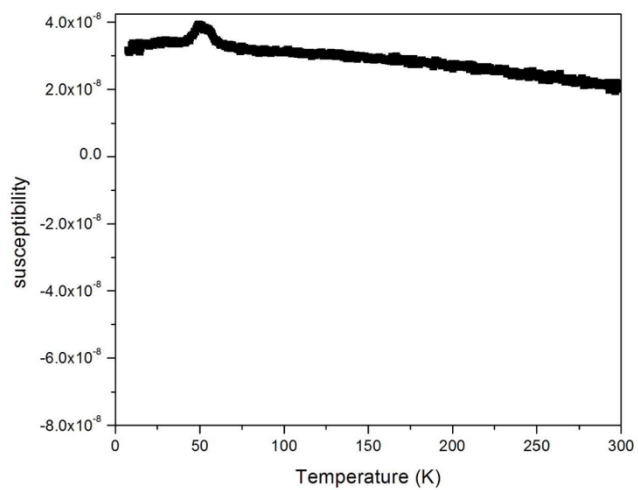

**Fig. S2:** The susceptibility vs temperature plot of Si substrate (blank).
